# Supplementary material
Source: MDPI journal article supplement (https://www.mdpi.com/2673-7078/1/2/17)
Supplement: s1 [file s1]

| Footwear | ST       |   |          |          |   |            |          |   |          |          |   |          |
|----------|----------|---|----------|----------|---|------------|----------|---|----------|----------|---|----------|
| Muscle   | Q        |   |          | H        |   |            | DF       |   |          | PF       |   |          |
| Time     | Mean     | ± | Std. Dev | Mean     | ± | Std. Dev   | Mean     | ± | Std. Dev | Mean     | ± | Std. Dev |
| PRE      | 157.604  | ± | 57.11604 | 123.1375 | ± | 51.4618909 | 252.4686 | ± | 103.7128 | 110.943  | ± | 42.1471  |
| 30       | 148.1758 | ± | 51.08979 | 107.5467 | ± | 42.7132154 | 236.1241 | ± | 93.72725 | 106.7154 | ± | 37.34552 |
| 60       | 128.5309 | ± | 47.23209 | 110.4345 | ± | 47.2112356 | 231.3814 | ± | 90.89996 | 108.1335 | ± | 35.04942 |
| 90       | 139.8903 | ± | 54.5966  | 117.1442 | ± | 51.1015542 | 244.4902 | ± | 114.5691 | 107.0322 | ± | 40.66956 |
| 120      | 149.5118 | ± | 54.26788 | 105.6561 | ± | 50.6117098 | 237.3597 | ± | 110.1852 | 111.9862 | ± | 35.09031 |
| 150      | 133.0857 | ± | 56.30366 | 104.4879 | ± | 39.3413189 | 236.3581 | ± | 111.5778 | 113.791  | ± | 45.46312 |
| 180      | 127.5651 | ± | 58.41768 | 110.0058 | ± | 45.2069493 | 244.4067 | ± | 115.113  | 110.4794 | ± | 40.87718 |
| 210      | 133.7844 | ± | 57.13071 | 102.1624 | ± | 44.4978295 | 233.7592 | ± | 118.3219 | 114.1283 | ± | 40.34617 |
| 240      | 133.4644 | ± | 61.60231 | 107.2186 | ± | 51.7624126 | 224.4786 | ± | 122.8702 | 106.4012 | ± | 33.48822 |
| Footwear | TB       |   |          |          |   |            |          |   |          |          |   |          |
| Muscle   | Q        |   |          | H        |   |            | DF       |   |          | PF       |   |          |
| Time     | Mean     | ± | Std. Dev | Mean     | ± | Std. Dev   | Mean     | ± | Std. Dev | Mean     | ± | Std. Dev |
| PRE      | 162.686  | ± | 81.90799 | 119.9281 | ± | 75.5839392 | 256.0295 | ± | 75.95421 | 102.6767 | ± | 36.89161 |
| 30       | 157.2227 | ± | 82.61544 | 126.2134 | ± | 69.0832062 | 243.9619 | ± | 68.83034 | 115.7231 | ± | 46.59333 |
| 60       | 142.1851 | ± | 72.94347 | 137.3223 | ± | 73.4850226 | 248.5922 | ± | 63.14851 | 120.6948 | ± | 46.05257 |
| 90       | 138.798  | ± | 67.55755 | 133.2919 | ± | 62.8028299 | 249.3775 | ± | 71.91562 | 116.5817 | ± | 44.96503 |
| 120      | 139.1751 | ± | 81.85872 | 133.4457 | ± | 78.7119242 | 247.1446 | ± | 68.10744 | 111.4784 | ± | 39.25844 |
| 150      | 130.5764 | ± | 63.38203 | 132.1232 | ± | 73.9888822 | 245.1618 | ± | 78.69252 | 110.4337 | ± | 39.84813 |
| 180      | 125.5146 | ± | 70.46922 | 121.9599 | ± | 79.3531976 | 235.5178 | ± | 69.67584 | 103.1232 | ± | 36.53714 |
| 210      | 134.8884 | ± | 60.41464 | 125.5307 | ± | 69.3017326 | 234.8163 | ± | 77.72193 | 108.0091 | ± | 40.7953  |
| 240      | 124.8375 | ± | 57.44978 | 121.1057 | ± | 82.4493343 | 247.829  | ± | 85.35886 | 106.2904 | ± | 42.54656 |
| Footwear | LT       |   |          |          |   |            |          |   |          |          |   |          |
| Muscle   | Q        |   |          | H        |   |            | DF       |   |          | PF       |   |          |
| Time     | Mean     | ± | Std. Dev | Mean     | ± | Std. Dev   | Mean     | ± | Std. Dev | Mean     | ± | Std. Dev |
| PRE      | 148.3644 | ± | 60.53997 | 140.1338 | ± | 63.5854267 | 278.1907 | ± | 120.1429 | 134.5366 | ± | 51.76484 |
| 30       | 142.0935 | ± | 48.4494  | 129.055  | ± | 65.0259346 | 263.3529 | ± | 110.437  | 130.1392 | ± | 47.34964 |
| 60       | 135.7135 | ± | 44.03563 | 127.1067 | ± | 70.8193197 | 269.1713 | ± | 121.5686 | 135.8284 | ± | 50.69586 |
| 90       | 144.439  | ± | 55.30292 | 137.7072 | ± | 65.136283  | 279.0418 | ± | 122.0718 | 138.471  | ± | 48.32182 |
| 120      | 143.5045 | ± | 59.26536 | 120.8724 | ± | 54.4647352 | 262.2843 | ± | 105.4833 | 128.6002 | ± | 44.72986 |
| 150      | 137.0285 | ± | 54.37928 | 125.2702 | ± | 67.4442258 | 266.6796 | ± | 108.9254 | 132.5075 | ± | 47.69299 |
| 180      | 133.5523 | ± | 48.74725 | 124.7868 | ± | 69.5523401 | 254.9089 | ± | 94.79838 | 116.9538 | ± | 37.12072 |
| 210      | 146.5917 | ± | 78.10559 | 113.3606 | ± | 63.9650931 | 254.2941 | ± | 126.6912 | 114.438  | ± | 36.62003 |
| 240      | 132.1429 | ± | 57.07851 | 112.8681 | ± | 64.5965819 | 240.4627 | ± | 122.5954 | 113.1055 | ± | 37.73791 |

**Supplemental File Table S1.** Mean muscle activity for all muscles [vastus medialis (VM), medial hamstrings (MH), tibialis anterior (TA) and medial gastrocnemius (MG)] during maximal voluntary isometric muscle action (MVIC) - Mean ± Standard Deviation for all three occupational footwear (steel-toed work boots – ST; tactical work boots – TB; low-top slip resistant shoes – LT), during the nine time points of testing (pre, 30, 60, 90, 120, 150, 180, 210, and 240 minute).

| Muscle - VM   |          |   |          |          |   |          |          |   |          |          |   |          |
|---------------|----------|---|----------|----------|---|----------|----------|---|----------|----------|---|----------|
| Footwear      | ST       |   |          |          |   |          |          |   |          |          |   |          |
| SOT Condition | EO       |   |          | EC       |   |          | EOSRV    |   |          | EOSRP    |   |          |
| Time          | Mean     | ± | Std. Dev |
| PRE           | 3.442412 | ± | 3.991134 | 3.658473 | ± | 4.358172 | 3.756545 | ± | 4.56971  | 4.075206 | ± | 4.643788 |
| 30            | 3.107242 | ± | 3.69569  | 3.379576 | ± | 3.945904 | 2.998672 | ± | 3.94639  | 3.657367 | ± | 4.417284 |
| 60            | 3.158844 | ± | 3.658178 | 3.31821  | ± | 3.733409 | 3.575041 | ± | 4.179173 | 3.998698 | ± | 4.228712 |
| 90            | 3.539731 | ± | 4.312608 | 3.411938 | ± | 4.199959 | 3.072941 | ± | 3.706375 | 3.628333 | ± | 3.97115  |
| 120           | 3.782433 | ± | 4.027714 | 4.008774 | ± | 4.405662 | 4.036154 | ± | 4.390536 | 4.722445 | ± | 4.945895 |
| 150           | 3.256394 | ± | 3.495112 | 3.376364 | ± | 3.616635 | 3.309224 | ± | 3.572183 | 3.608959 | ± | 3.696026 |
| 180           | 3.154065 | ± | 3.48583  | 3.523795 | ± | 3.901908 | 3.57167  | ± | 4.083273 | 3.431245 | ± | 3.831316 |
| 210           | 3.305601 | ± | 3.8324   | 3.188244 | ± | 3.48026  | 3.01674  | ± | 3.306549 | 3.102162 | ± | 3.392637 |
| 240           | 3.477693 | ± | 3.699746 | 4.388734 | ± | 5.658165 | 3.0316   | ± | 3.480133 | 3.747234 | ± | 4.374233 |
| Footwear      | TB       |   |          |          |   |          |          |   |          |          |   |          |
| SOT Condition | EO       |   |          | EC       |   |          | EOSRV    |   |          | EOSRP    |   |          |
| Time          | Mean     | ± | Std. Dev |
| PRE           | 4.180395 | ± | 4.464635 | 4.795309 | ± | 4.987481 | 4.882316 | ± | 5.778602 | 5.918479 | ± | 5.91171  |
| 30            | 3.942249 | ± | 4.67726  | 4.462154 | ± | 5.49788  | 4.437713 | ± | 5.557037 | 4.777614 | ± | 5.139558 |
| 60            | 4.169897 | ± | 5.524723 | 4.433573 | ± | 5.815331 | 4.078066 | ± | 4.597185 | 4.80923  | ± | 5.830594 |
| 90            | 3.51248  | ± | 4.074814 | 3.863601 | ± | 4.431771 | 4.391305 | ± | 5.167914 | 4.487483 | ± | 4.934037 |
| 120           | 3.652333 | ± | 4.480817 | 3.766339 | ± | 4.525743 | 3.85791  | ± | 4.596591 | 4.605307 | ± | 4.979009 |
| 150           | 3.69064  | ± | 4.498742 | 3.419906 | ± | 3.657388 | 4.089768 | ± | 4.810471 | 4.629656 | ± | 4.929241 |
| 180           | 3.720995 | ± | 4.098369 | 3.816908 | ± | 4.05189  | 3.799365 | ± | 4.075838 | 4.366745 | ± | 4.703548 |
| 210           | 4.275325 | ± | 4.804798 | 4.489281 | ± | 4.721764 | 4.32948  | ± | 4.974998 | 5.020906 | ± | 4.929727 |
| 240           | 4.02706  | ± | 4.334709 | 3.99127  | ± | 4.288685 | 4.404906 | ± | 4.243906 | 4.66535  | ± | 4.60857  |
| Footwear      | LT       |   |          |          |   |          |          |   |          |          |   |          |
| SOT Condition | EO       |   |          | EC       |   |          | EOSRV    |   |          | EOSRP    |   |          |
| Time          | Mean     | ± | Std. Dev |
| PRE           | 3.620009 | ± | 4.424325 | 3.648197 | ± | 4.222043 | 4.322132 | ± | 5.215355 | 4.379144 | ± | 5.029238 |
| 30            | 3.920586 | ± | 4.795028 | 3.981186 | ± | 4.756291 | 3.601407 | ± | 4.16138  | 4.290485 | ± | 5.157292 |
| 60            | 3.451472 | ± | 3.888551 | 3.893016 | ± | 4.150073 | 3.527244 | ± | 3.435921 | 4.393843 | ± | 5.222771 |
| 90            | 3.477207 | ± | 3.913182 | 4.256284 | ± | 4.953411 | 3.660027 | ± | 3.960601 | 4.372884 | ± | 5.089214 |
| 120           | 3.615213 | ± | 4.180589 | 4.046605 | ± | 4.634381 | 3.541299 | ± | 3.996626 | 3.978548 | ± | 4.888187 |
| 150           | 3.731173 | ± | 4.541126 | 3.645528 | ± | 4.41261  | 3.910742 | ± | 4.725387 | 4.452809 | ± | 5.202305 |
| 180           | 3.677922 | ± | 4.376686 | 3.871316 | ± | 4.328492 | 3.195406 | ± | 3.75034  | 4.270564 | ± | 4.876889 |
| 210           | 3.989392 | ± | 4.17492  | 4.089879 | ± | 3.8919   | 4.125751 | ± | 4.635672 | 4.318494 | ± | 4.504151 |
| 240           | 3.313687 | ± | 4.067398 | 3.56058  | ± | 4.202285 | 3.258859 | ± | 4.009705 | 4.02669  | ± | 4.753595 |

**Supplemental File Table S2.** Mean muscle activity for vastus medialis (VM) during sensory organization test (SOT) conditions [eyes open (EO), eyes closed (EC), eyes open sway referenced vision (EOSRV) and eyes open sway referenced platform (EOSRP)] - Mean ± Standard Deviation for all three occupational footwear (steel-toed work boots – ST; tactical work boots – TB; low-top slip resistant shoes – LT), during the nine time points of testing (pre, 30, 60, 90, 120, 150, 180, 210, and 240 minute).

| Muscle - MH   |          |   |          |          |   |          |          |   |          |          |   |          |
|---------------|----------|---|----------|----------|---|----------|----------|---|----------|----------|---|----------|
| Footwear      | ST       |   |          |          |   |          |          |   |          |          |   |          |
| SOT Condition | EO       |   |          | EC       |   |          | EOSRV    |   |          | EOSRP    |   |          |
| Time          | Mean     | ± | Std. Dev |
| PRE           | 5.425975 | ± | 8.922959 | 6.393934 | ± | 7.87169  | 6.640117 | ± | 9.212073 | 5.308055 | ± | 5.262561 |
| 30            | 6.003387 | ± | 11.07215 | 6.09222  | ± | 10.0689  | 7.301451 | ± | 10.35186 | 5.472668 | ± | 5.123194 |
| 60            | 6.583689 | ± | 11.4215  | 7.331886 | ± | 10.33201 | 5.58329  | ± | 5.103586 | 5.738193 | ± | 4.624696 |
| 90            | 6.600403 | ± | 9.818378 | 6.913934 | ± | 8.395489 | 7.243885 | ± | 8.005412 | 5.856442 | ± | 6.293954 |
| 120           | 6.335996 | ± | 10.41607 | 5.78855  | ± | 7.582476 | 5.696981 | ± | 7.277292 | 5.29429  | ± | 4.690974 |
| 150           | 5.837517 | ± | 8.371866 | 5.980224 | ± | 7.815477 | 7.338681 | ± | 10.58268 | 6.092622 | ± | 6.237634 |
| 180           | 6.846347 | ± | 12.02405 | 6.583479 | ± | 8.943216 | 6.420907 | ± | 6.036131 | 4.874464 | ± | 4.395266 |
| 210           | 7.267783 | ± | 11.15793 | 6.575404 | ± | 9.881163 | 5.362864 | ± | 4.142971 | 6.451885 | ± | 8.04285  |
| 240           | 6.076931 | ± | 9.07636  | 6.518749 | ± | 9.060703 | 8.485905 | ± | 11.4581  | 5.94341  | ± | 6.983417 |
| Footwear      | TB       |   |          |          |   |          |          |   |          |          |   |          |
| SOT Condition | EO       |   |          | EC       |   |          | EOSRV    |   |          | EOSRP    |   |          |
| Time          | Mean     | ± | Std. Dev |
| PRE           | 5.666174 | ± | 8.383415 | 7.172693 | ± | 8.683164 | 7.752306 | ± | 8.003005 | 5.4605   | ± | 5.071159 |
| 30            | 7.401868 | ± | 9.438772 | 6.177781 | ± | 5.799132 | 6.208374 | ± | 6.581649 | 6.749584 | ± | 7.467044 |
| 60            | 5.990266 | ± | 4.313402 | 7.508935 | ± | 6.25981  | 6.670467 | ± | 6.065316 | 5.974619 | ± | 5.179354 |
| 90            | 6.044318 | ± | 6.029421 | 6.202795 | ± | 6.262111 | 5.80255  | ± | 5.515782 | 5.437951 | ± | 4.715941 |
| 120           | 5.350494 | ± | 5.255967 | 6.927776 | ± | 5.980955 | 6.329007 | ± | 5.332789 | 5.115581 | ± | 4.640811 |
| 150           | 5.496353 | ± | 6.083196 | 5.640979 | ± | 4.982136 | 5.964889 | ± | 5.093311 | 5.449105 | ± | 4.451096 |
| 180           | 5.253136 | ± | 4.972642 | 7.07598  | ± | 7.981577 | 7.298448 | ± | 8.080971 | 5.079749 | ± | 4.701315 |
| 210           | 5.149054 | ± | 4.783367 | 6.035981 | ± | 6.455193 | 6.391072 | ± | 6.490601 | 6.392195 | ± | 6.61683  |
| 240           | 5.066231 | ± | 4.882232 | 5.896677 | ± | 4.795964 | 7.217195 | ± | 7.339015 | 5.195151 | ± | 4.61299  |
| Footwear      | LT       |   |          |          |   |          |          |   |          |          |   |          |
| SOT Condition | EO       |   |          | EC       |   |          | EOSRV    |   |          | EOSRP    |   |          |
| Time          | Mean     | ± | Std. Dev |
| PRE           | 5.193784 | ± | 6.534303 | 5.428763 | ± | 6.181983 | 5.190624 | ± | 4.118482 | 4.292577 | ± | 3.642645 |
| 30            | 4.391802 | ± | 3.707952 | 4.6929   | ± | 3.572427 | 5.674241 | ± | 5.213611 | 5.033261 | ± | 5.224471 |
| 60            | 5.825814 | ± | 7.443625 | 4.383238 | ± | 3.458464 | 6.332808 | ± | 6.435533 | 3.924143 | ± | 2.902618 |
| 90            | 5.749157 | ± | 4.995011 | 4.217725 | ± | 3.034673 | 6.612553 | ± | 6.444498 | 4.547969 | ± | 3.060864 |
| 120           | 4.360834 | ± | 4.664863 | 5.649281 | ± | 4.800041 | 5.652043 | ± | 3.976911 | 3.906493 | ± | 2.210254 |
| 150           | 3.071033 | ± | 1.819127 | 3.900182 | ± | 2.660835 | 5.25622  | ± | 6.154903 | 3.852067 | ± | 2.89956  |
| 180           | 4.341937 | ± | 3.258601 | 5.042842 | ± | 3.589638 | 5.116267 | ± | 5.013122 | 4.552326 | ± | 3.776054 |
| 210           | 4.222532 | ± | 3.957767 | 5.640393 | ± | 6.064928 | 4.539795 | ± | 3.97664  | 4.376889 | ± | 3.562111 |
| 240           | 4.344725 | ± | 4.695582 | 5.097013 | ± | 4.023631 | 4.76837  | ± | 4.160539 | 3.961189 | ± | 3.764375 |

**Supplemental File Table S3.** Mean muscle activity for medial hamstrings (MH) during sensory organization test (SOT) conditions [eyes open (EO), eyes closed (EC), eyes open sway referenced vision (EOSRV) and eyes open sway referenced platform (EOSRP)] - Mean ± Standard Deviation for all three occupational footwear (steel-toed work boots – ST; tactical work boots – TB; low-top slip resistant shoes – LT), during the nine time points of testing (pre, 30, 60, 90, 120, 150, 180, 210, and 240 minute).

| Muscle - TA   |          |   |          |          |   |          |          |   |          |          |   |          |
|---------------|----------|---|----------|----------|---|----------|----------|---|----------|----------|---|----------|
| Footwear      | ST       |   |          |          |   |          |          |   |          |          |   |          |
| SOT Condition | EO       |   |          | EC       |   |          | EOSRV    |   |          | EOSRP    |   |          |
| Time          | Mean     | ± | Std. Dev |
| PRE           | 1.295642 | ± | 0.383272 | 2.597254 | ± | 4.188833 | 2.097069 | ± | 1.930469 | 3.115956 | ± | 2.891606 |
| 30            | 1.354072 | ± | 0.331782 | 2.128164 | ± | 1.469607 | 1.729745 | ± | 0.567876 | 3.691182 | ± | 4.178011 |
| 60            | 1.317758 | ± | 0.320883 | 1.477392 | ± | 0.382066 | 1.561606 | ± | 0.505938 | 3.555166 | ± | 3.606225 |
| 90            | 1.391081 | ± | 0.368264 | 1.483883 | ± | 0.35431  | 1.640099 | ± | 0.448533 | 5.048203 | ± | 6.0081   |
| 120           | 1.781652 | ± | 1.219271 | 1.706882 | ± | 0.63438  | 1.855648 | ± | 0.873276 | 3.855457 | ± | 2.993088 |
| 150           | 1.587731 | ± | 0.671285 | 1.893283 | ± | 1.229911 | 2.173583 | ± | 1.377641 | 3.832416 | ± | 2.694869 |
| 180           | 1.462307 | ± | 0.374228 | 1.804282 | ± | 0.730287 | 2.356496 | ± | 2.194733 | 5.364059 | ± | 5.588861 |
| 210           | 1.384565 | ± | 0.380957 | 1.824116 | ± | 0.805184 | 1.899315 | ± | 0.672751 | 3.991739 | ± | 2.273727 |
| 240           | 1.582752 | ± | 0.419442 | 1.670877 | ± | 0.379012 | 1.856056 | ± | 0.670347 | 4.531994 | ± | 4.04299  |
| Footwear      | TB       |   |          |          |   |          |          |   |          |          |   |          |
| SOT Condition | EO       |   |          | EC       |   |          | EOSRV    |   |          | EOSRP    |   |          |
| Time          | Mean     | ± | Std. Dev |
| PRE           | 1.396053 | ± | 0.532939 | 1.578149 | ± | 0.580125 | 1.716319 | ± | 0.652306 | 3.697127 | ± | 2.834848 |
| 30            | 1.432438 | ± | 0.444146 | 1.504403 | ± | 0.465936 | 1.836074 | ± | 0.922274 | 3.876443 | ± | 4.004839 |
| 60            | 1.400748 | ± | 0.324137 | 2.05106  | ± | 1.508673 | 2.652151 | ± | 1.976769 | 3.463805 | ± | 3.548819 |
| 90            | 1.433344 | ± | 0.334989 | 1.415601 | ± | 0.217938 | 1.9164   | ± | 0.730149 | 3.219368 | ± | 2.74517  |
| 120           | 1.612714 | ± | 0.453051 | 1.734769 | ± | 0.899613 | 1.78335  | ± | 0.669255 | 3.627012 | ± | 3.098931 |
| 150           | 1.45369  | ± | 0.325819 | 1.986688 | ± | 0.75039  | 1.926153 | ± | 0.958844 | 3.406151 | ± | 2.61475  |
| 180           | 1.454185 | ± | 0.333225 | 1.998205 | ± | 1.610928 | 2.827781 | ± | 2.771193 | 4.450208 | ± | 3.667234 |
| 210           | 1.977456 | ± | 1.092605 | 2.626368 | ± | 2.986413 | 1.826812 | ± | 0.764463 | 5.623366 | ± | 7.333196 |
| 240           | 1.821188 | ± | 0.923778 | 1.649956 | ± | 0.770187 | 3.920827 | ± | 6.650898 | 4.258104 | ± | 6.160351 |
| Footwear      | LT       |   |          |          |   |          |          |   |          |          |   |          |
| SOT Condition | EO       |   |          | EC       |   |          | EOSRV    |   |          | EOSRP    |   |          |
| Time          | Mean     | ± | Std. Dev |
| PRE           | 1.491401 | ± | 0.255257 | 1.69053  | ± | 0.399175 | 2.390312 | ± | 1.996488 | 6.628433 | ± | 10.24143 |
| 30            | 1.603991 | ± | 0.670837 | 1.808764 | ± | 0.94359  | 1.67649  | ± | 0.52304  | 5.102561 | ± | 6.364316 |
| 60            | 1.577346 | ± | 0.630313 | 1.706225 | ± | 0.421363 | 1.558404 | ± | 0.353435 | 4.019318 | ± | 4.410151 |
| 90            | 1.973299 | ± | 1.287763 | 1.849547 | ± | 0.902434 | 1.799014 | ± | 1.336994 | 5.743846 | ± | 10.15072 |
| 120           | 2.09463  | ± | 1.681841 | 1.558905 | ± | 0.356942 | 2.194778 | ± | 1.074402 | 3.747764 | ± | 3.165599 |
| 150           | 1.494247 | ± | 0.397263 | 1.803246 | ± | 0.552933 | 1.770467 | ± | 0.572378 | 4.937181 | ± | 4.42222  |
| 180           | 1.542563 | ± | 0.407535 | 2.271628 | ± | 1.894952 | 1.618916 | ± | 0.352876 | 5.661471 | ± | 6.616693 |
| 210           | 1.384001 | ± | 0.444582 | 1.966784 | ± | 0.874032 | 2.041311 | ± | 0.801635 | 3.822266 | ± | 2.366075 |
| 240           | 1.472265 | ± | 0.600926 | 1.797136 | ± | 0.508728 | 2.029116 | ± | 1.672896 | 3.840241 | ± | 2.368076 |

**Supplemental File Table S4.** Mean muscle activity for tibialis anterior (TA) during sensory organization test (SOT) conditions [eyes open (EO), eyes closed (EC), eyes open sway referenced vision (EOSRV) and eyes open sway referenced platform (EOSRP)] - Mean ± Standard Deviation for all three occupational footwear (steel-toed work boots – ST; tactical work boots – TB; low-top slip resistant shoes – LT), during the nine time points of testing (pre, 30, 60, 90, 120, 150, 180, 210, and 240 minute).

| Muscle - MG   |          |   |          |          |   |          |          |   |          |          |   |          |
|---------------|----------|---|----------|----------|---|----------|----------|---|----------|----------|---|----------|
| Footwear      | ST       |   |          |          |   |          |          |   |          |          |   |          |
| SOT Condition | EO       |   |          | EC       |   |          | EOSRV    |   |          | EOSRP    |   |          |
| Time          | Mean     | ± | Std. Dev |
| PRE           | 5.928087 | ± | 3.812115 | 7.266915 | ± | 4.502141 | 7.632021 | ± | 4.682258 | 8.606228 | ± | 4.693854 |
| 30            | 5.616126 | ± | 5.096663 | 8.019775 | ± | 5.037291 | 9.920603 | ± | 6.267188 | 8.999109 | ± | 7.127171 |
| 60            | 6.609906 | ± | 5.381101 | 7.702218 | ± | 5.555379 | 8.064165 | ± | 5.444715 | 8.692459 | ± | 5.594886 |
| 90            | 6.766957 | ± | 6.257805 | 8.011879 | ± | 5.443164 | 9.07286  | ± | 6.591799 | 8.734031 | ± | 5.598046 |
| 120           | 7.717686 | ± | 5.194955 | 8.489575 | ± | 5.142987 | 7.776085 | ± | 3.920908 | 8.591188 | ± | 4.498113 |
| 150           | 6.992658 | ± | 4.281323 | 7.91747  | ± | 4.578543 | 9.519327 | ± | 6.754175 | 8.507631 | ± | 5.307314 |
| 180           | 7.400824 | ± | 5.020677 | 7.478049 | ± | 4.220996 | 8.94772  | ± | 6.220648 | 8.275195 | ± | 4.708401 |
| 210           | 6.150693 | ± | 4.354225 | 7.717231 | ± | 4.417937 | 8.760978 | ± | 5.137966 | 7.824684 | ± | 4.835122 |
| 240           | 7.348944 | ± | 5.318895 | 9.257278 | ± | 5.446523 | 9.133273 | ± | 5.40253  | 9.32419  | ± | 5.850982 |
| Footwear      | TB       |   |          |          |   |          |          |   |          |          |   |          |
| SOT Condition | EO       |   |          | EC       |   |          | EOSRV    |   |          | EOSRP    |   |          |
| Time          | Mean     | ± | Std. Dev |
| PRE           | 5.459805 | ± | 3.948676 | 7.128541 | ± | 3.987855 | 8.031241 | ± | 5.649533 | 5.833558 | ± | 3.736158 |
| 30            | 6.076979 | ± | 4.198353 | 7.492241 | ± | 5.799982 | 7.449834 | ± | 5.407905 | 6.982701 | ± | 4.927431 |
| 60            | 7.060078 | ± | 6.072055 | 8.205092 | ± | 6.474829 | 8.617735 | ± | 5.631123 | 7.74776  | ± | 5.130279 |
| 90            | 7.775461 | ± | 5.846185 | 8.290959 | ± | 5.30698  | 7.947748 | ± | 5.656587 | 7.969674 | ± | 4.947549 |
| 120           | 6.916352 | ± | 5.309476 | 8.873664 | ± | 6.518338 | 9.20403  | ± | 7.469049 | 8.182356 | ± | 6.289029 |
| 150           | 7.25955  | ± | 4.935531 | 9.359634 | ± | 6.333868 | 8.109086 | ± | 5.11545  | 8.207663 | ± | 4.710165 |
| 180           | 7.494363 | ± | 5.93104  | 9.577941 | ± | 7.189142 | 8.553168 | ± | 5.820367 | 6.977568 | ± | 4.177425 |
| 210           | 7.935986 | ± | 6.622995 | 9.502354 | ± | 7.307104 | 8.320402 | ± | 6.506224 | 7.645986 | ± | 5.01121  |
| 240           | 6.923709 | ± | 5.430891 | 8.294642 | ± | 5.795328 | 7.867348 | ± | 5.415999 | 7.065849 | ± | 4.653359 |
| Footwear      | LT       |   |          |          |   |          |          |   |          |          |   |          |
| SOT Condition | EO       |   |          | EC       |   |          | EOSRV    |   |          | EOSRP    |   |          |
| Time          | Mean     | ± | Std. Dev |
| PRE           | 7.007792 | ± | 5.723827 | 8.02884  | ± | 5.911018 | 8.012975 | ± | 6.624487 | 9.08031  | ± | 7.431396 |
| 30            | 6.739533 | ± | 5.718898 | 7.799765 | ± | 6.546388 | 7.89827  | ± | 5.510165 | 8.154599 | ± | 7.298673 |
| 60            | 5.797886 | ± | 4.018199 | 7.069179 | ± | 5.028604 | 7.492317 | ± | 4.279121 | 8.071087 | ± | 7.426729 |
| 90            | 5.658326 | ± | 3.731939 | 7.209356 | ± | 5.420588 | 7.588133 | ± | 6.053443 | 8.382835 | ± | 7.516739 |
| 120           | 6.525259 | ± | 5.827186 | 7.556595 | ± | 6.078999 | 8.24711  | ± | 7.428758 | 8.505805 | ± | 8.319128 |
| 150           | 5.683109 | ± | 4.067307 | 7.75648  | ± | 5.499917 | 7.780607 | ± | 6.197791 | 8.64517  | ± | 8.4903   |
| 180           | 7.101533 | ± | 6.65899  | 9.298257 | ± | 7.146138 | 9.645594 | ± | 8.301748 | 10.09437 | ± | 10.11609 |
| 210           | 6.58432  | ± | 5.292421 | 8.388448 | ± | 7.256583 | 9.201286 | ± | 8.160479 | 8.806777 | ± | 8.52416  |
| 240           | 7.031701 | ± | 6.024737 | 9.043894 | ± | 7.64614  | 9.164561 | ± | 8.253759 | 8.319582 | ± | 6.777789 |

**Supplemental File Table S5.** Mean muscle activity for medial gastrocnemius (MG) during sensory organization test (SOT) conditions [eyes open (EO), eyes closed (EC), eyes open sway referenced vision (EOSRV) and eyes open sway referenced platform (EOSRP)] - Mean ± Standard Deviation for all three occupational footwear (steel-toed work boots – ST; tactical work boots – TB; low-top slip resistant shoes – LT), during the nine time points of testing (pre, 30, 60, 90, 120, 150, 180, 210, and 240 minute).

| Muscle - VM   |          |   |          |          |   |          |          |   |          |          |   |          |
|---------------|----------|---|----------|----------|---|----------|----------|---|----------|----------|---|----------|
| Footwear      | ST       |   |          |          |   |          |          |   |          |          |   |          |
| SOT Condition | EO       |   |          | EC       |   |          | EOSRV    |   |          | EOSRP    |   |          |
| Time          | Mean     | ± | Std. Dev |
| PRE           | 2.342096 | ± | 2.932657 | 2.600144 | ± | 3.668365 | 2.679811 | ± | 3.782014 | 2.883212 | ± | 3.761625 |
| 30            | 2.141132 | ± | 2.431562 | 2.311324 | ± | 2.634089 | 2.048996 | ± | 2.538939 | 2.48751  | ± | 2.880483 |
| 60            | 2.740116 | ± | 3.233491 | 2.914421 | ± | 3.313632 | 3.198669 | ± | 3.992688 | 3.450054 | ± | 3.87067  |
| 90            | 2.742773 | ± | 3.13793  | 2.608251 | ± | 3.161859 | 2.441434 | ± | 2.933483 | 2.94343  | ± | 3.288142 |
| 120           | 2.496612 | ± | 2.668432 | 2.68084  | ± | 2.933908 | 2.754127 | ± | 3.039904 | 3.208703 | ± | 3.504604 |
| 150           | 2.990651 | ± | 3.711662 | 3.095712 | ± | 3.748866 | 3.048434 | ± | 3.592897 | 3.357451 | ± | 3.737119 |
| 180           | 3.053964 | ± | 3.706568 | 3.351357 | ± | 3.961179 | 3.512679 | ± | 4.348804 | 3.394056 | ± | 4.180449 |
| 210           | 2.791865 | ± | 3.329582 | 2.742313 | ± | 3.246913 | 2.525273 | ± | 2.715523 | 2.755759 | ± | 3.363293 |
| 240           | 2.976518 | ± | 3.411154 | 3.121231 | ± | 3.396339 | 2.623652 | ± | 3.18244  | 3.147963 | ± | 3.592753 |
| Footwear      | TB       |   |          |          |   |          |          |   |          |          |   |          |
| SOT Condition | EO       |   |          | EC       |   |          | EOSRV    |   |          | EOSRP    |   |          |
| Time          | Mean     | ± | Std. Dev |
| PRE           | 2.834286 | ± | 2.741272 | 3.17898  | ± | 2.981884 | 3.209145 | ± | 3.35933  | 4.157607 | ± | 3.695829 |
| 30            | 2.604781 | ± | 2.659871 | 2.96408  | ± | 3.110368 | 2.936242 | ± | 3.287098 | 3.2098   | ± | 3.114081 |
| 60            | 3.412067 | ± | 4.631833 | 3.572741 | ± | 4.831619 | 3.161287 | ± | 3.508233 | 3.809167 | ± | 4.752829 |
| 90            | 3.157669 | ± | 4.111347 | 3.562645 | ± | 4.74433  | 4.106498 | ± | 5.551976 | 4.031211 | ± | 5.35021  |
| 120           | 3.608609 | ± | 5.034619 | 3.654686 | ± | 5.012662 | 3.817761 | ± | 5.208832 | 4.567896 | ± | 6.364168 |
| 150           | 3.296099 | ± | 4.07914  | 3.026983 | ± | 3.296661 | 3.668771 | ± | 4.290294 | 4.111775 | ± | 4.516171 |
| 180           | 3.617934 | ± | 4.156381 | 3.607792 | ± | 3.856729 | 3.64502  | ± | 3.913571 | 4.489327 | ± | 5.180644 |
| 210           | 3.579169 | ± | 4.248408 | 3.652895 | ± | 4.081745 | 3.585674 | ± | 4.20828  | 4.092961 | ± | 4.277746 |
| 240           | 3.921851 | ± | 4.726828 | 3.810562 | ± | 4.376078 | 4.104223 | ± | 4.18839  | 4.603986 | ± | 5.179524 |
| Footwear      | LT       |   |          |          |   |          |          |   |          |          |   |          |
| SOT Condition | EO       |   |          | EC       |   |          | EOSRV    |   |          | EOSRP    |   |          |
| Time          | Mean     | ± | Std. Dev |
| PRE           | 2.484301 | ± | 3.256995 | 2.465602 | ± | 2.958811 | 2.995447 | ± | 3.895771 | 2.969015 | ± | 3.367452 |
| 30            | 2.909583 | ± | 3.778419 | 2.969571 | ± | 3.762548 | 2.677181 | ± | 3.207537 | 3.238184 | ± | 4.094123 |
| 60            | 2.567355 | ± | 2.941925 | 2.850003 | ± | 2.951392 | 2.622636 | ± | 2.478018 | 3.232541 | ± | 3.716614 |
| 90            | 2.697477 | ± | 3.121686 | 3.479057 | ± | 4.623408 | 2.874509 | ± | 3.198818 | 3.582025 | ± | 4.675373 |
| 120           | 2.786058 | ± | 3.498133 | 3.168753 | ± | 3.804419 | 2.753253 | ± | 3.343548 | 3.14931  | ± | 4.202865 |
| 150           | 3.108283 | ± | 4.10709  | 2.992386 | ± | 3.836409 | 3.217195 | ± | 4.085559 | 3.665937 | ± | 4.551524 |
| 180           | 3.183738 | ± | 4.066976 | 3.334345 | ± | 4.08947  | 2.750236 | ± | 3.37474  | 3.740874 | ± | 4.606827 |
| 210           | 3.558099 | ± | 4.83513  | 3.461743 | ± | 4.133693 | 3.575961 | ± | 5.07614  | 3.752407 | ± | 4.950683 |
| 240           | 2.873447 | ± | 4.051084 | 3.062893 | ± | 4.152684 | 2.862614 | ± | 4.055778 | 3.510406 | ± | 4.66896  |

**Supplemental File Table S6.** Percent (%) activation muscle activity for vastus medialis (VM) during sensory organization test (SOT) conditions [eyes open (EO), eyes closed (EC), eyes open sway referenced vision (EOSRV) and eyes open sway referenced platform (EOSRP)] - Mean ± Standard Deviation for all three occupational footwear (steel-toed work boots – ST; tactical work boots – TB; low-top slip resistant shoes – LT), during the nine time points of testing (pre, 30, 60, 90, 120, 150, 180, 210, and 240 minute).

| Muscle - MH   |          |   |          |          |   |          |          |   |          |          |   |          |
|---------------|----------|---|----------|----------|---|----------|----------|---|----------|----------|---|----------|
| Footwear      | ST       |   |          |          |   |          |          |   |          |          |   |          |
| SOT Condition | EO       |   |          | EC       |   |          | EOSRV    |   |          | EOSRP    |   |          |
| Time          | Mean     | ± | Std. Dev |
| PRE           | 4.065542 | ± | 4.593613 | 5.343055 | ± | 4.362911 | 4.301781 | ± | 3.076605 | 4.222563 | ± | 3.419706 |
| 30            | 5.176414 | ± | 8.341461 | 5.369426 | ± | 7.518658 | 4.568301 | ± | 2.352432 | 4.216323 | ± | 2.385288 |
| 60            | 5.597151 | ± | 7.185505 | 6.338827 | ± | 6.710717 | 4.93576  | ± | 3.35839  | 5.271332 | ± | 3.461722 |
| 90            | 5.45     | ± | 5.4536   | 5.787871 | ± | 4.822196 | 5.371028 | ± | 4.085463 | 4.865443 | ± | 4.037336 |
| 120           | 6.230452 | ± | 8.345746 | 5.82437  | ± | 6.208628 | 4.38825  | ± | 3.625089 | 5.070517 | ± | 3.769123 |
| 150           | 6.154739 | ± | 8.373753 | 6.540596 | ± | 7.99582  | 5.290743 | ± | 3.643185 | 4.954211 | ± | 3.500875 |
| 180           | 5.498578 | ± | 6.771908 | 5.846079 | ± | 5.202174 | 5.281691 | ± | 3.232858 | 4.599537 | ± | 3.682651 |
| 210           | 6.813663 | ± | 7.633046 | 6.611333 | ± | 6.88437  | 5.591863 | ± | 4.16967  | 5.474774 | ± | 4.33678  |
| 240           | 6.142706 | ± | 6.69495  | 6.481501 | ± | 6.844376 | 6.131725 | ± | 4.191427 | 5.33426  | ± | 4.216891 |
| Footwear      | TB       |   |          |          |   |          |          |   |          |          |   |          |
| SOT Condition | EO       |   |          | EC       |   |          | EOSRV    |   |          | EOSRP    |   |          |
| Time          | Mean     | ± | Std. Dev |
| PRE           | 9.690779 | ± | 22.04634 | 11.35118 | ± | 23.36827 | 5.579315 | ± | 3.850623 | 4.565359 | ± | 3.778652 |
| 30            | 7.315947 | ± | 11.71022 | 6.336271 | ± | 6.457323 | 4.946336 | ± | 4.676042 | 4.946699 | ± | 4.651061 |
| 60            | 4.926498 | ± | 3.485557 | 6.157098 | ± | 4.791602 | 5.015484 | ± | 4.256339 | 4.548223 | ± | 3.620465 |
| 90            | 5.083433 | ± | 4.731239 | 5.293429 | ± | 4.802687 | 4.499241 | ± | 4.075587 | 4.352763 | ± | 3.640468 |
| 120           | 5.078326 | ± | 4.754988 | 6.256002 | ± | 5.16984  | 5.102769 | ± | 4.059637 | 4.783802 | ± | 5.038031 |
| 150           | 5.029644 | ± | 5.349254 | 5.075517 | ± | 4.099507 | 4.921403 | ± | 4.049896 | 4.291323 | ± | 3.164675 |
| 180           | 5.730552 | ± | 5.692898 | 7.246154 | ± | 7.127885 | 6.073337 | ± | 5.398053 | 4.781762 | ± | 4.589582 |
| 210           | 4.953468 | ± | 4.59576  | 5.426175 | ± | 4.820817 | 5.134321 | ± | 4.455107 | 5.059894 | ± | 4.393243 |
| 240           | 5.221652 | ± | 4.532668 | 5.850977 | ± | 4.447571 | 5.994187 | ± | 5.252488 | 4.916015 | ± | 4.704246 |
| Footwear      | LT       |   |          |          |   |          |          |   |          |          |   |          |
| SOT Condition | EO       |   |          | EC       |   |          | EOSRV    |   |          | EOSRP    |   |          |
| Time          | Mean     | ± | Std. Dev |
| PRE           | 4.300129 | ± | 4.608207 | 4.684363 | ± | 4.821681 | 4.487964 | ± | 4.141602 | 4.0999   | ± | 4.988304 |
| 30            | 4.328775 | ± | 3.959809 | 4.958264 | ± | 4.60756  | 5.1774   | ± | 5.296766 | 4.910825 | ± | 5.847303 |
| 60            | 6.172583 | ± | 8.231976 | 4.974426 | ± | 4.819282 | 5.787491 | ± | 6.736369 | 4.721776 | ± | 5.394599 |
| 90            | 4.875307 | ± | 4.320293 | 4.474985 | ± | 5.136512 | 5.327668 | ± | 5.120864 | 4.485612 | ± | 4.967042 |
| 120           | 4.532341 | ± | 5.107579 | 5.859256 | ± | 5.324425 | 5.256615 | ± | 4.458498 | 4.154482 | ± | 3.751937 |
| 150           | 3.682346 | ± | 3.65218  | 4.549267 | ± | 4.298003 | 4.261754 | ± | 4.266193 | 5.182053 | ± | 6.569611 |
| 180           | 4.928522 | ± | 4.405316 | 5.907943 | ± | 5.451798 | 4.930691 | ± | 5.531245 | 5.438117 | ± | 6.755297 |
| 210           | 5.070946 | ± | 5.309084 | 6.70865  | ± | 6.831195 | 4.893084 | ± | 4.458538 | 5.562589 | ± | 6.540819 |
| 240           | 5.098585 | ± | 5.551915 | 6.654439 | ± | 6.989508 | 5.379634 | ± | 5.871693 | 4.656383 | ± | 5.468987 |

**Supplemental File Table S7.** Percent (%) activation muscle activity for medial hamstrings (MH) during sensory organization test (SOT) conditions [eyes open (EO), eyes closed (EC), eyes open sway referenced vision (EOSRV) and eyes open sway referenced platform (EOSRP)] - Mean ± Standard Deviation for all three occupational footwear (steel-toed work boots – ST; tactical work boots – TB; low-top slip resistant shoes – LT), during the nine time points of testing (pre, 30, 60, 90, 120, 150, 180, 210, and 240 minute).

| Muscle - TA   |          |   |          |          |   |          |          |   |          |          |   |          |
|---------------|----------|---|----------|----------|---|----------|----------|---|----------|----------|---|----------|
| Footwear      | ST       |   |          |          |   |          |          |   |          |          |   |          |
| SOT Condition | EO       |   |          | EC       |   |          | EOSRV    |   |          | EOSRP    |   |          |
| Time          | Mean     | ± | Std. Dev |
| PRE           | 0.579364 | ± | 0.261695 | 1.238498 | ± | 2.174298 | 0.995987 | ± | 1.050535 | 1.49861  | ± | 1.739309 |
| 30            | 0.649426 | ± | 0.268112 | 1.031365 | ± | 0.724702 | 0.837977 | ± | 0.398198 | 1.830516 | ± | 2.485219 |
| 60            | 0.641688 | ± | 0.282308 | 0.714748 | ± | 0.287401 | 0.7605   | ± | 0.373512 | 1.782311 | ± | 2.261659 |
| 90            | 0.635625 | ± | 0.235137 | 0.691272 | ± | 0.271314 | 0.777338 | ± | 0.360026 | 2.512092 | ± | 3.608437 |
| 120           | 0.890529 | ± | 0.846361 | 0.811868 | ± | 0.398284 | 0.875608 | ± | 0.473595 | 1.75811  | ± | 1.302605 |
| 150           | 0.736578 | ± | 0.287126 | 1.000139 | ± | 1.022962 | 1.053279 | ± | 0.677839 | 1.780331 | ± | 1.149403 |
| 180           | 0.652997 | ± | 0.18772  | 0.806061 | ± | 0.324991 | 1.054728 | ± | 0.901416 | 2.633509 | ± | 3.14489  |
| 210           | 0.671541 | ± | 0.269988 | 0.857272 | ± | 0.34032  | 0.965782 | ± | 0.60221  | 2.062237 | ± | 1.578192 |
| 240           | 0.79666  | ± | 0.313004 | 0.841032 | ± | 0.284725 | 0.951394 | ± | 0.481161 | 2.532828 | ± | 2.538621 |
| Footwear      | TB       |   |          |          |   |          |          |   |          |          |   |          |
| SOT Condition | EO       |   |          | EC       |   |          | EOSRV    |   |          | EOSRP    |   |          |
| Time          | Mean     | ± | Std. Dev |
| PRE           | 0.565972 | ± | 0.197334 | 0.656719 | ± | 0.277341 | 0.739357 | ± | 0.407893 | 1.678262 | ± | 1.639854 |
| 30            | 0.608762 | ± | 0.16452  | 0.641023 | ± | 0.183649 | 0.788418 | ± | 0.345102 | 1.501875 | ± | 1.266702 |
| 60            | 0.58914  | ± | 0.1663   | 0.896862 | ± | 0.677821 | 1.07247  | ± | 0.702295 | 1.358976 | ± | 1.175656 |
| 90            | 0.614221 | ± | 0.2164   | 0.610762 | ± | 0.197361 | 0.839299 | ± | 0.399456 | 1.293418 | ± | 1.039549 |
| 120           | 0.709931 | ± | 0.3155   | 0.761972 | ± | 0.488671 | 0.772292 | ± | 0.312592 | 1.455824 | ± | 1.042595 |
| 150           | 0.648342 | ± | 0.239612 | 0.891984 | ± | 0.40479  | 0.858799 | ± | 0.453505 | 1.479788 | ± | 1.105389 |
| 180           | 0.662534 | ± | 0.227298 | 0.867854 | ± | 0.56795  | 1.216417 | ± | 0.99275  | 1.980365 | ± | 1.726994 |
| 210           | 0.932234 | ± | 0.632425 | 1.381894 | ± | 2.152905 | 0.8201   | ± | 0.296673 | 2.29373  | ± | 2.552012 |
| 240           | 0.768129 | ± | 0.368263 | 0.716244 | ± | 0.309472 | 1.439251 | ± | 2.141583 | 1.739199 | ± | 2.084601 |
| Footwear      | LT       |   |          |          |   |          |          |   |          |          |   |          |
| SOT Condition | EO       |   |          | EC       |   |          | EOSRV    |   |          | EOSRP    |   |          |
| Time          | Mean     | ± | Std. Dev |
| PRE           | 0.600563 | ± | 0.19161  | 0.681721 | ± | 0.255684 | 1.039401 | ± | 1.095503 | 2.921833 | ± | 5.140305 |
| 30            | 0.688624 | ± | 0.356848 | 0.767847 | ± | 0.464728 | 0.699998 | ± | 0.257531 | 2.272425 | ± | 3.508536 |
| 60            | 0.721956 | ± | 0.553011 | 0.739682 | ± | 0.326546 | 0.675914 | ± | 0.298471 | 1.922329 | ± | 2.449304 |
| 90            | 0.854403 | ± | 0.742367 | 0.794649 | ± | 0.628749 | 0.783372 | ± | 0.727578 | 2.493403 | ± | 4.585006 |
| 120           | 0.909766 | ± | 0.876853 | 0.653823 | ± | 0.212625 | 0.887428 | ± | 0.375218 | 1.548122 | ± | 1.33419  |
| 150           | 0.635537 | ± | 0.255349 | 0.763222 | ± | 0.352265 | 0.72959  | ± | 0.269155 | 2.162093 | ± | 2.376716 |
| 180           | 0.666917 | ± | 0.25271  | 1.056948 | ± | 1.162712 | 0.699589 | ± | 0.256053 | 2.604096 | ± | 3.513772 |
| 210           | 0.611785 | ± | 0.248708 | 0.907387 | ± | 0.534574 | 0.909725 | ± | 0.411918 | 1.679179 | ± | 1.210651 |
| 240           | 0.743425 | ± | 0.480641 | 0.906469 | ± | 0.490432 | 0.891128 | ± | 0.480504 | 1.999877 | ± | 1.720376 |

**Supplemental File Table S8.** Percent (%) activation muscle activity for tibialis anterior (TA) during sensory organization test (SOT) conditions [eyes open (EO), eyes closed (EC), eyes open sway referenced vision (EOSRV) and eyes open sway referenced platform (EOSRP)] - Mean ± Standard Deviation for all three occupational footwear (steel-toed work boots – ST; tactical work boots – TB; low-top slip resistant shoes – LT), during the nine time points of testing (pre, 30, 60, 90, 120, 150, 180, 210, and 240 minute).



| Muscle - MG   |          |   |          |          |   |          |          |   |          |          |   |          |
|---------------|----------|---|----------|----------|---|----------|----------|---|----------|----------|---|----------|
| Footwear      | ST       |   |          |          |   |          |          |   |          |          |   |          |
| SOT Condition | EO       |   |          | EC       |   |          | EOSRV    |   |          | EOSRP    |   |          |
| Time          | Mean     | ± | Std. Dev |
| PRE           | 6.484025 | ± | 5.345691 | 7.997332 | ± | 6.6332   | 7.860542 | ± | 5.416712 | 8.659561 | ± | 4.689399 |
| 30            | 5.71634  | ± | 5.667164 | 8.273735 | ± | 5.913436 | 10.26781 | ± | 7.05043  | 9.468091 | ± | 7.944165 |
| 60            | 6.782361 | ± | 5.470645 | 7.787952 | ± | 5.806887 | 8.198584 | ± | 5.791889 | 8.769997 | ± | 5.750231 |
| 90            | 7.085022 | ± | 6.32344  | 8.670785 | ± | 6.210283 | 9.825873 | ± | 7.384303 | 8.961014 | ± | 5.486098 |
| 120           | 8.067351 | ± | 6.258583 | 8.973499 | ± | 6.61327  | 7.848782 | ± | 4.964543 | 8.51164  | ± | 4.784638 |
| 150           | 7.209072 | ± | 4.944453 | 7.96851  | ± | 5.018653 | 9.399281 | ± | 6.802317 | 8.181595 | ± | 4.921824 |
| 180           | 7.586942 | ± | 5.209742 | 7.917767 | ± | 5.498322 | 9.335368 | ± | 6.912407 | 8.734993 | ± | 6.060975 |
| 210           | 6.240717 | ± | 4.607752 | 7.701908 | ± | 5.168234 | 8.694043 | ± | 5.719682 | 7.555551 | ± | 4.938906 |
| 240           | 7.834219 | ± | 6.279866 | 9.546419 | ± | 5.830119 | 9.183098 | ± | 5.691153 | 9.227305 | ± | 5.25989  |
| Footwear      | TB       |   |          |          |   |          |          |   |          |          |   |          |
| SOT Condition | EO       |   |          | EC       |   |          | EOSRV    |   |          | EOSRP    |   |          |
| Time          | Mean     | ± | Std. Dev |
| PRE           | 5.874377 | ± | 4.792763 | 7.496256 | ± | 4.908581 | 8.641804 | ± | 7.332297 | 6.174584 | ± | 4.09442  |
| 30            | 6.210758 | ± | 6.751567 | 7.540081 | ± | 8.409276 | 7.90391  | ± | 9.593969 | 7.16736  | ± | 8.214986 |
| 60            | 7.017854 | ± | 9.164806 | 8.139762 | ± | 9.840355 | 8.227262 | ± | 7.416733 | 7.357375 | ± | 6.328566 |
| 90            | 7.369823 | ± | 6.995062 | 7.709302 | ± | 5.652378 | 7.267664 | ± | 5.82072  | 7.434895 | ± | 4.919619 |
| 120           | 7.168409 | ± | 7.468603 | 8.976807 | ± | 8.956898 | 9.459655 | ± | 10.68507 | 8.069759 | ± | 8.22685  |
| 150           | 6.686041 | ± | 3.928412 | 8.806328 | ± | 6.146699 | 7.877265 | ± | 5.429907 | 7.88542  | ± | 4.534237 |
| 180           | 7.841528 | ± | 6.909312 | 9.892462 | ± | 8.261518 | 8.971501 | ± | 6.774707 | 7.289555 | ± | 4.193299 |
| 210           | 7.622666 | ± | 6.734065 | 9.454029 | ± | 8.052578 | 8.115314 | ± | 6.705111 | 7.543103 | ± | 4.700447 |
| 240           | 7.038858 | ± | 5.840558 | 8.370024 | ± | 5.882008 | 8.033324 | ± | 5.624909 | 7.200631 | ± | 4.896225 |
| Footwear      | LT       |   |          |          |   |          |          |   |          |          |   |          |
| SOT Condition | EO       |   |          | EC       |   |          | EOSRV    |   |          | EOSRP    |   |          |
| Time          | Mean     | ± | Std. Dev |
| PRE           | 6.463545 | ± | 6.552356 | 7.381669 | ± | 6.669184 | 7.057976 | ± | 6.364849 | 7.946225 | ± | 6.424319 |
| 30            | 6.450381 | ± | 6.372488 | 7.19008  | ± | 6.645132 | 7.220295 | ± | 6.302493 | 7.534748 | ± | 7.90429  |
| 60            | 5.071451 | ± | 3.725942 | 6.113281 | ± | 4.425545 | 6.396871 | ± | 4.040093 | 6.918373 | ± | 5.733243 |
| 90            | 4.740059 | ± | 3.703292 | 5.817929 | ± | 4.053653 | 6.027181 | ± | 4.734787 | 6.86594  | ± | 6.016441 |
| 120           | 6.171465 | ± | 6.438211 | 6.859773 | ± | 5.725892 | 7.343533 | ± | 7.30305  | 7.692483 | ± | 7.679926 |
| 150           | 5.229699 | ± | 4.614895 | 6.77876  | ± | 5.633848 | 6.697083 | ± | 5.983223 | 7.410624 | ± | 7.564151 |
| 180           | 7.205764 | ± | 8.086669 | 9.207432 | ± | 8.25572  | 9.697295 | ± | 9.603444 | 10.17852 | ± | 10.85448 |
| 210           | 6.605011 | ± | 5.961289 | 7.912907 | ± | 6.613618 | 8.860309 | ± | 7.633381 | 8.626047 | ± | 8.551879 |
| 240           | 7.132741 | ± | 6.579826 | 9.003567 | ± | 7.497705 | 9.022269 | ± | 8.404916 | 8.388024 | ± | 6.820645 |

**Supplemental File Table S9.** Percent (%) activation muscle activity for medial gastrocnemius (MG) during sensory organization test (SOT) conditions [eyes open (EO), eyes closed (EC), eyes open sway referenced vision (EOSRV) and eyes open sway referenced platform (EOSRP)] - Mean ± Standard Deviation for all three occupational footwear (steel-toed work boots – ST; tactical work boots – TB; low-top slip resistant shoes – LT), during the nine time points of testing (pre, 30, 60, 90, 120, 150, 180, 210, and 240 minute).
